# Supplementary material
Source: PubMed Central journal article supplement (PMC6066284)
Supplement: NIHMS977757-supplement-Suppl.pdf [file NIHMS977757-supplement-Suppl.pdf]

## Supplementary Materials

### Legends

**Supplementary Figure 1. Proportional Hazard Assumption Verification for Cox Regression.** Plots of log of the cumulative hazards function versus log of survival time to ensure that the proportional hazards assumption was satisfied. The variables included a) age, b) gender, c) race, d) region, e) stage, f) radiotherapy, g) chemotherapy, h) surgical resection, i) urban/rural status, j) carcinoid syndrome, k) octreotide, l) primary site, and m) grade.

**Supplementary Figure 2. Overall Survival in Metastatic Grade 1-2 NETs of Other Primary Sites.** Overall survival in relation to the presence or absence of carcinoid syndrome in grade 1-2 NET of the a) cecum, b) colon or rectum, and c) lung, bronchus, and other respiratory organs.

Supplementary Figure 1. Proportional Hazard Assumption Verification for Cox Regression  
a. Age

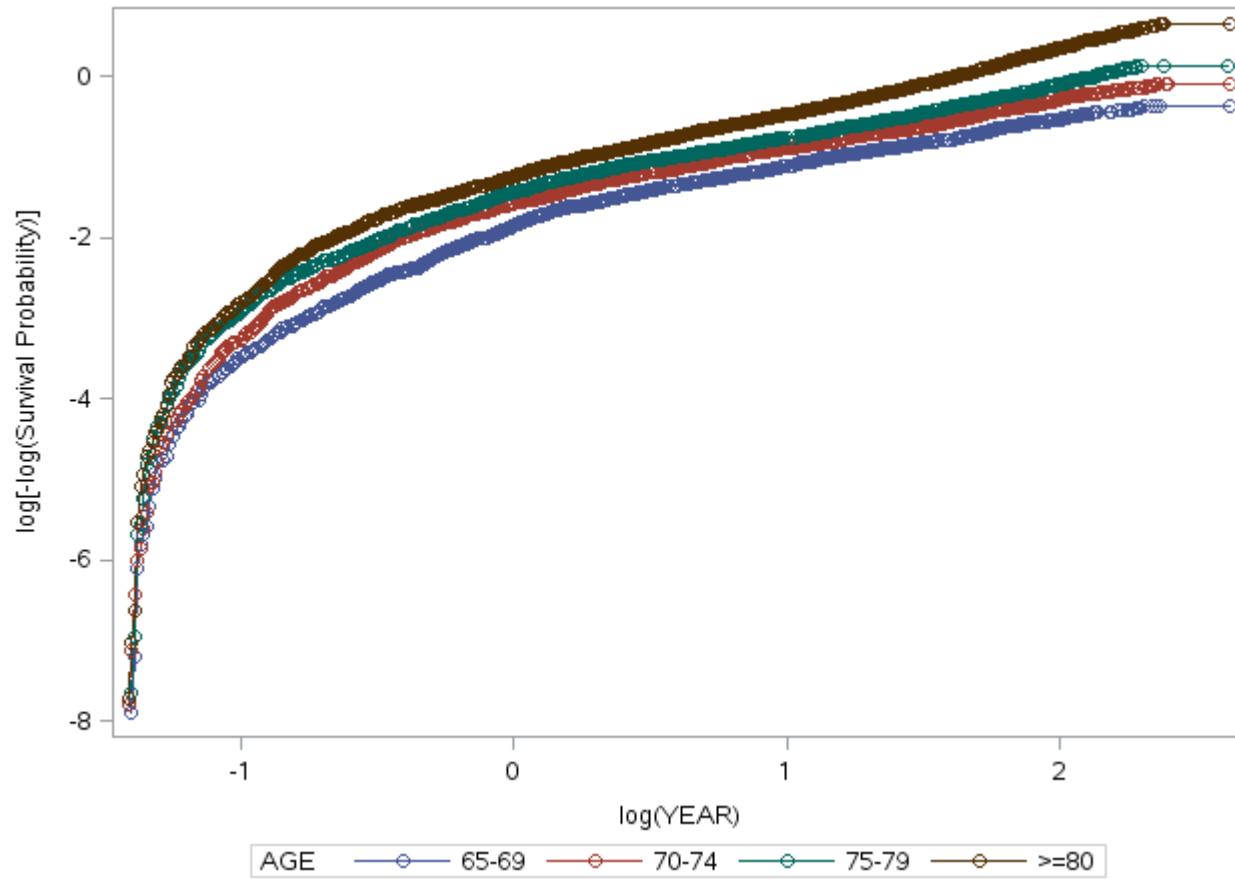

b. Gender

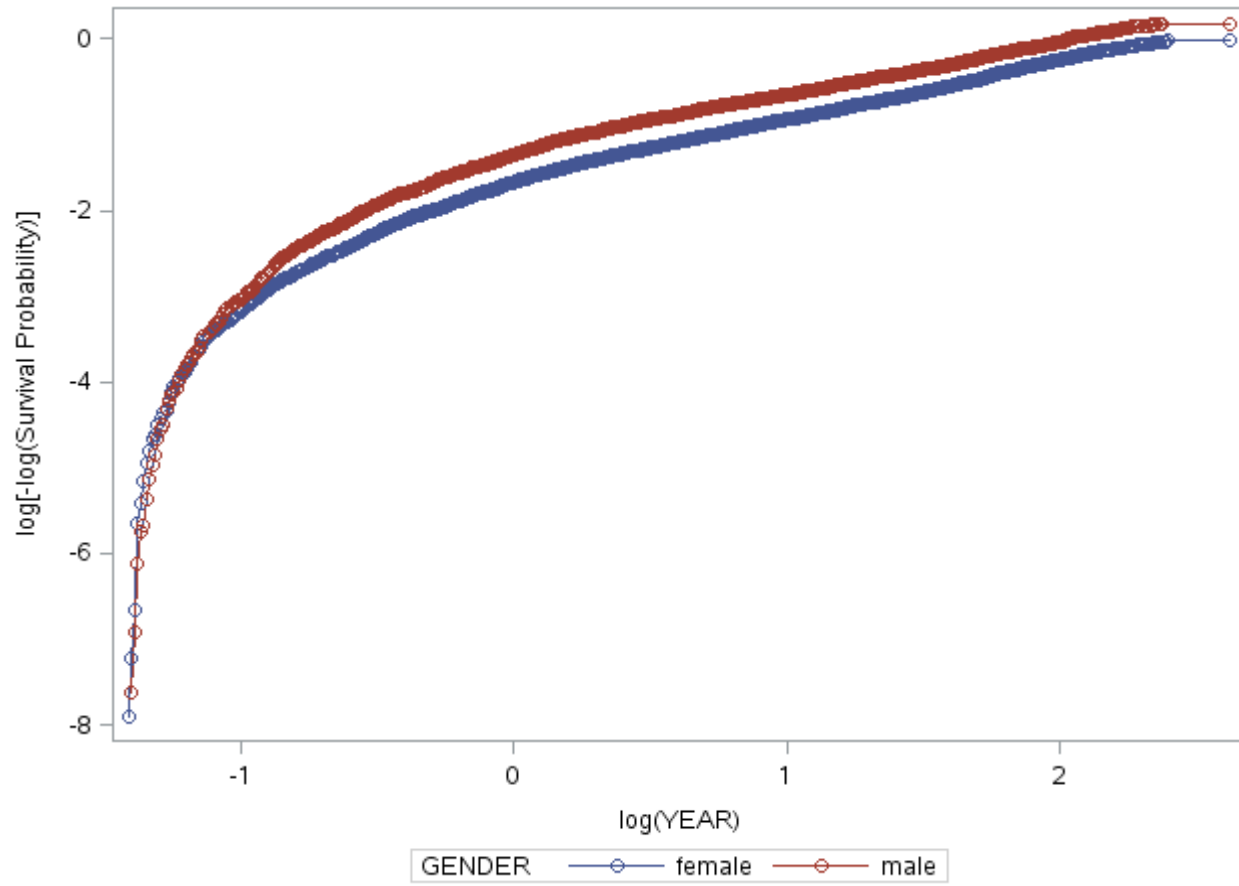

c. Race

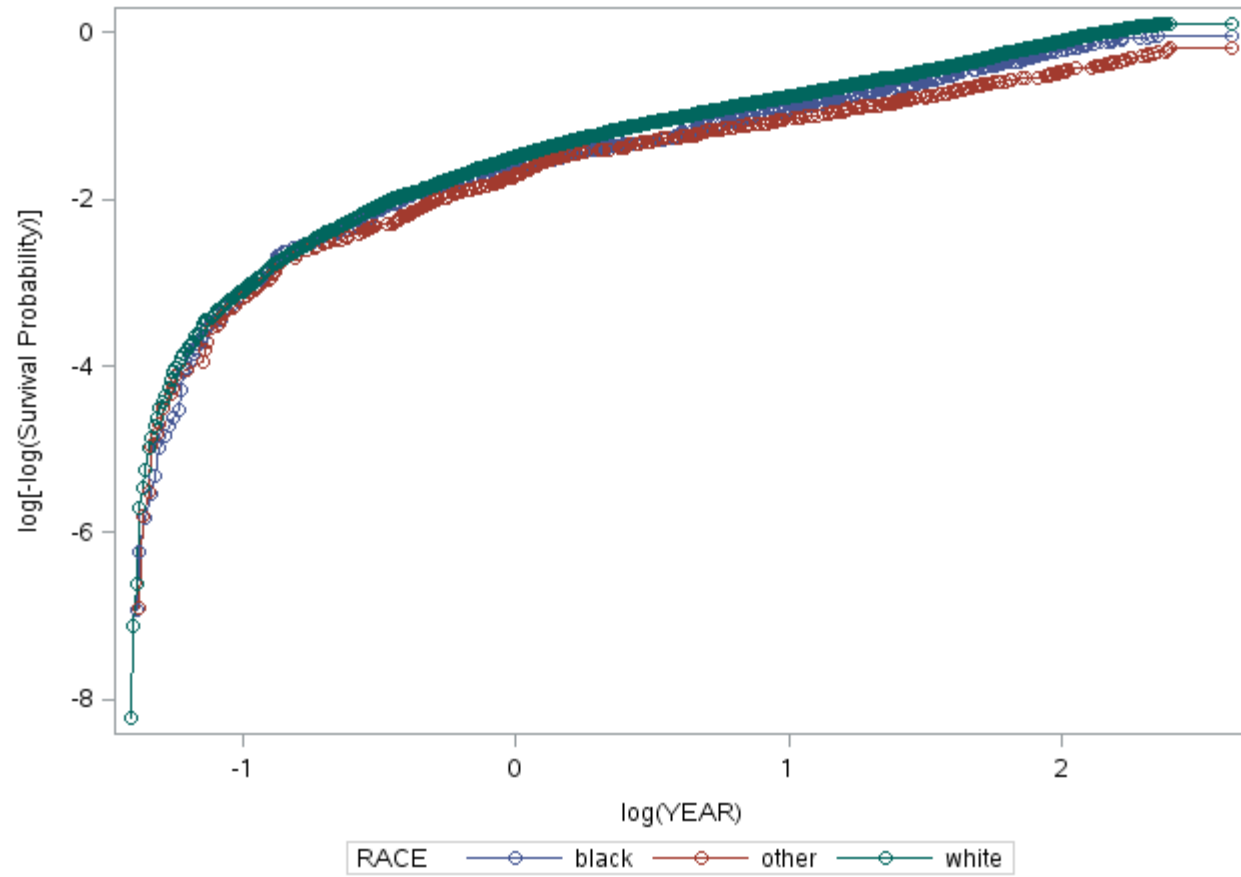

d. Region

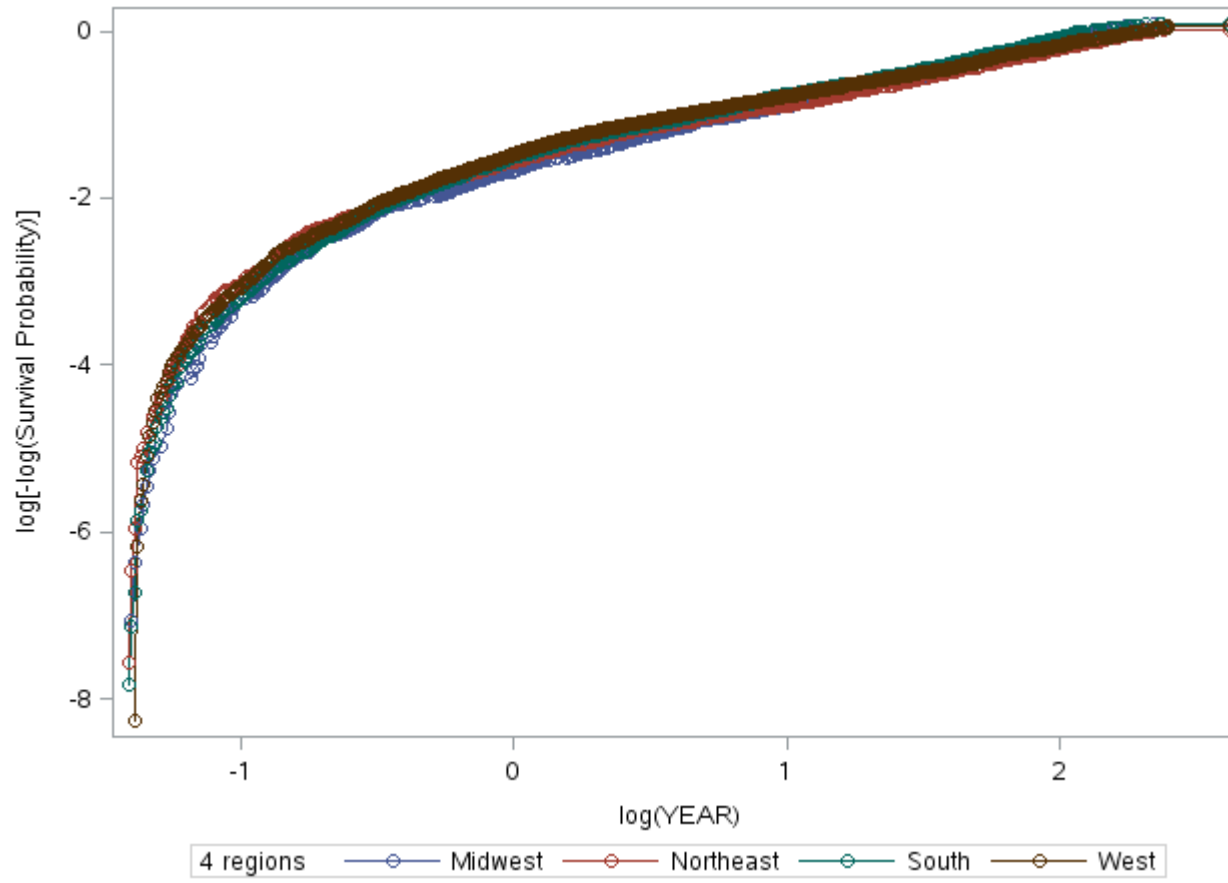

e. Stage

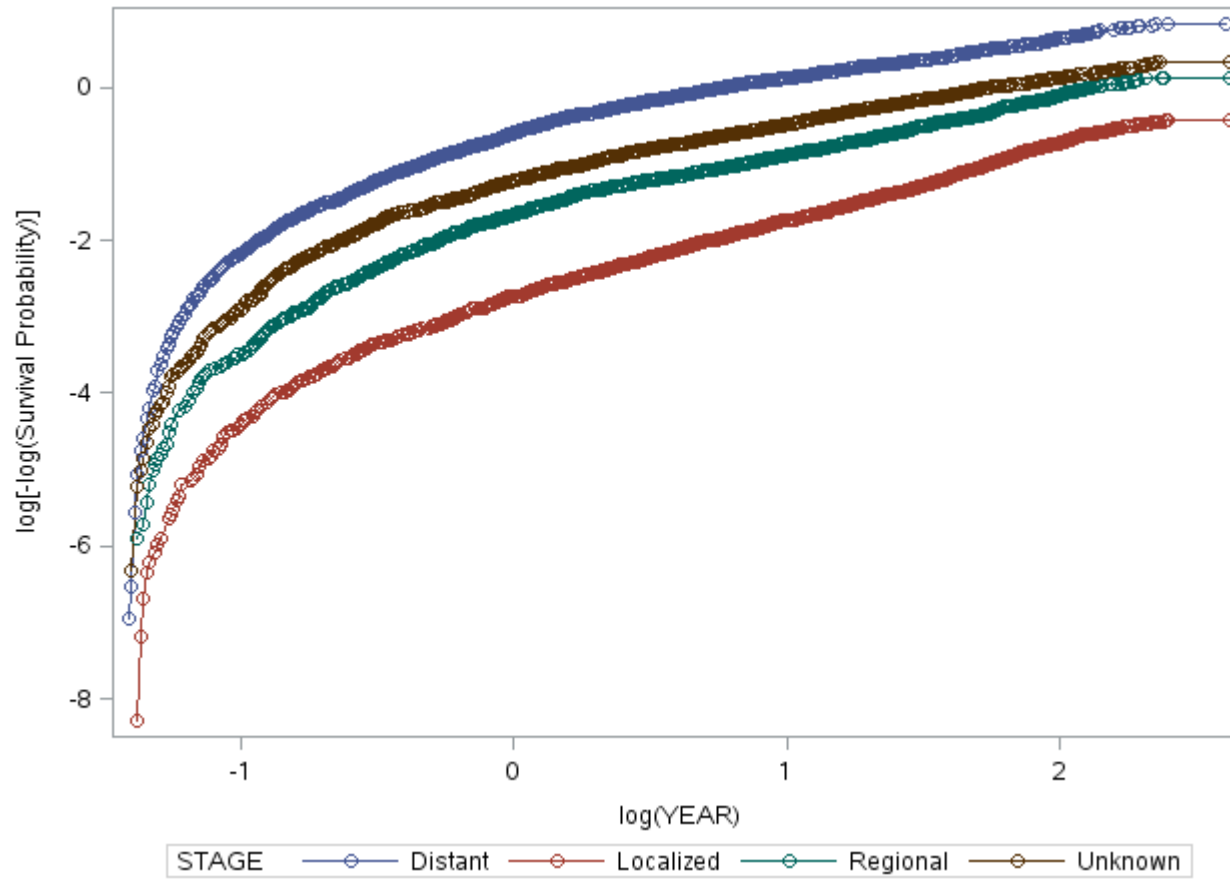

**f. Radiotherapy**

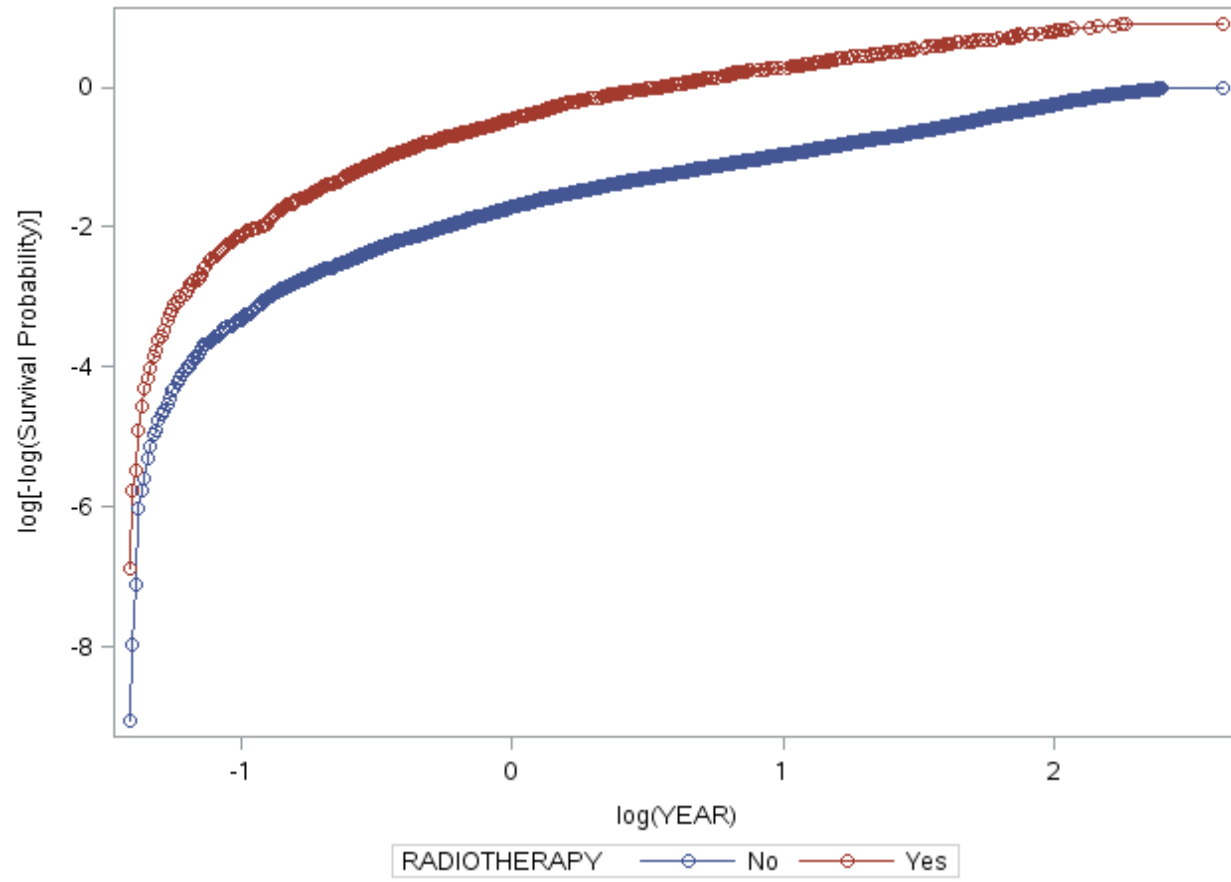

g. Chemotherapy

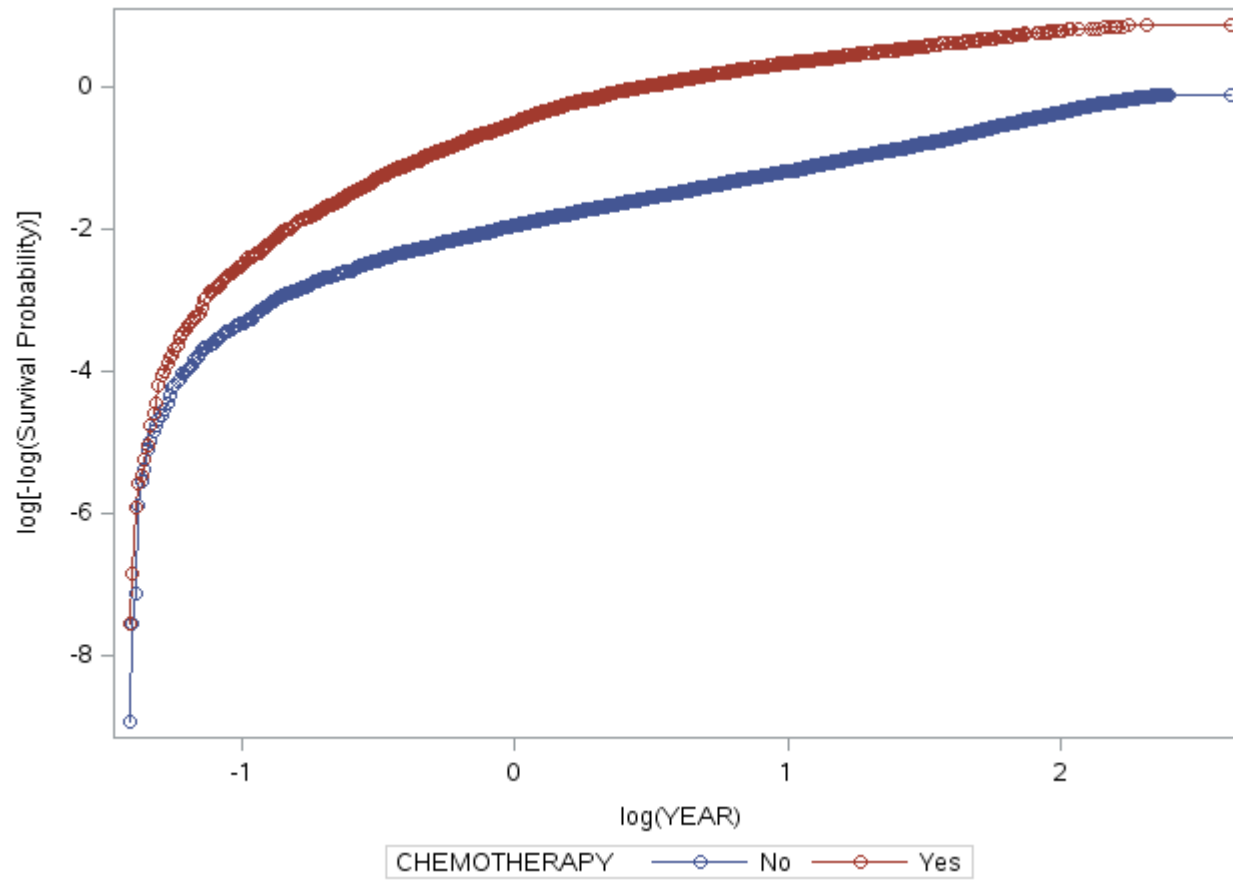



### h. Surgical Resection

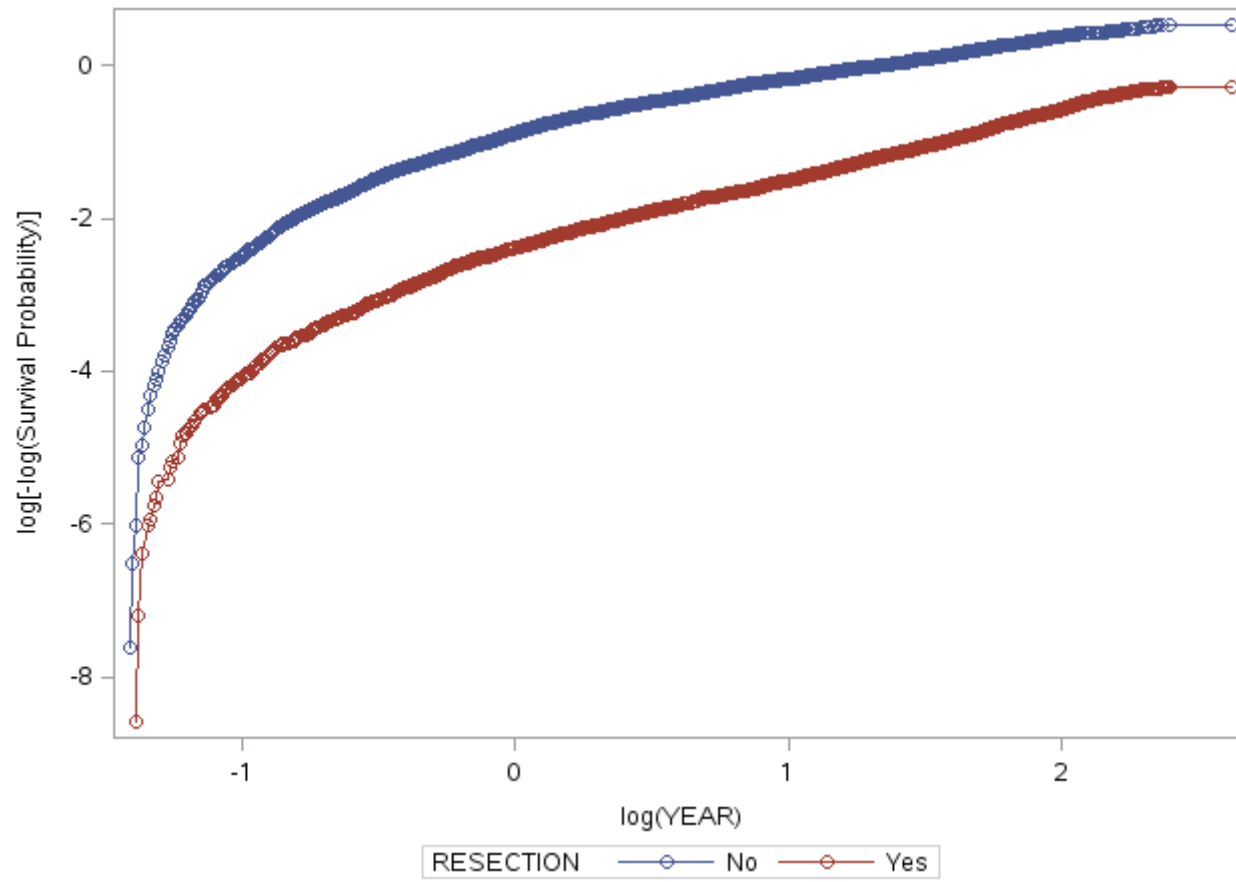

**i. Urban/Rural Status**

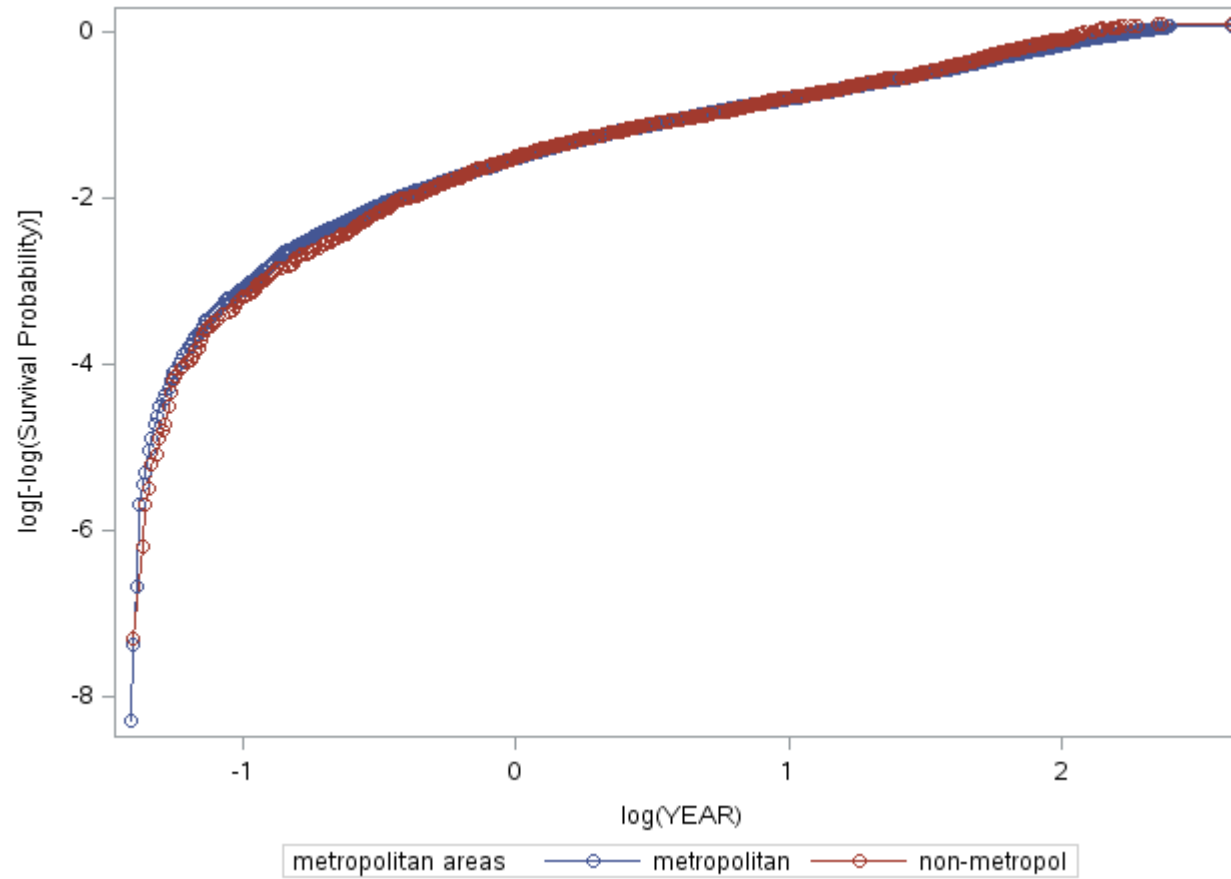

j. Carcinoid Syndrome

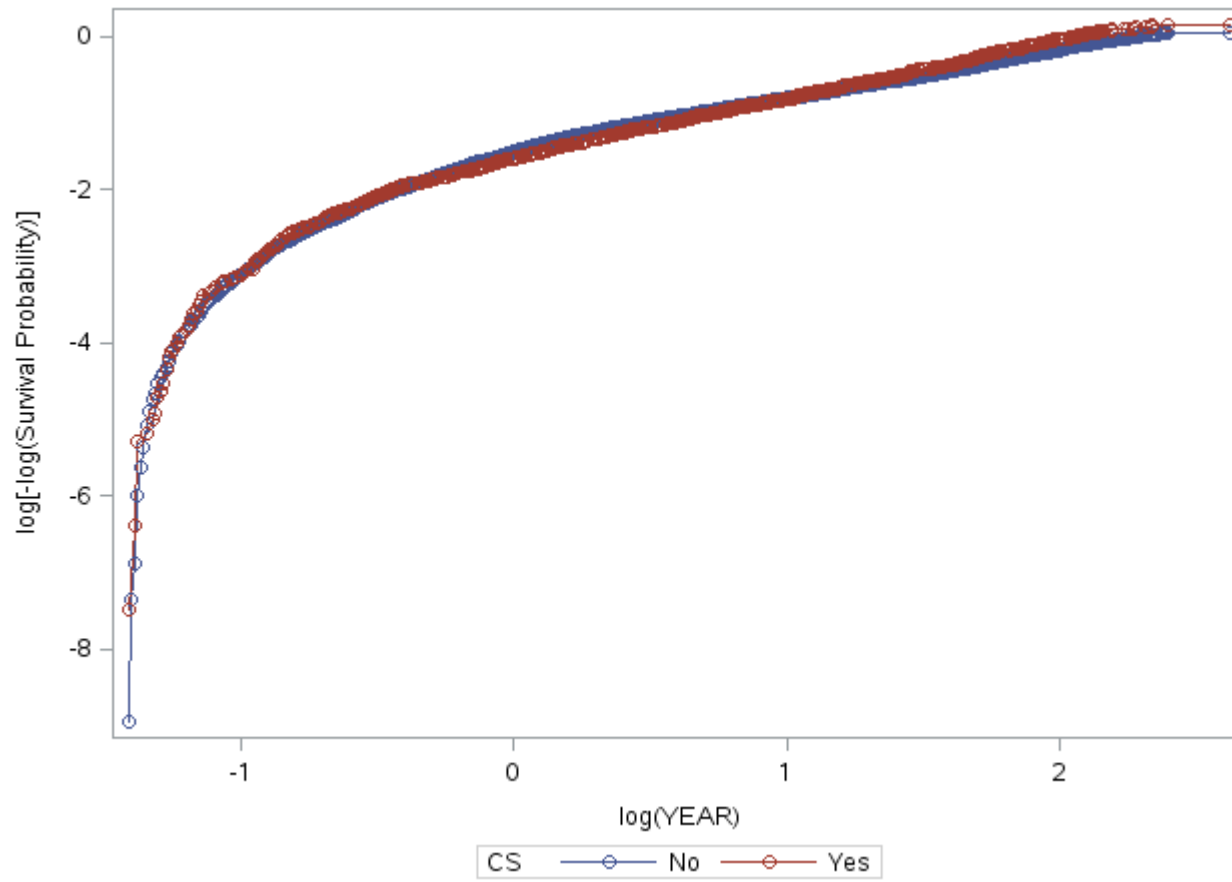

k. Octreotide

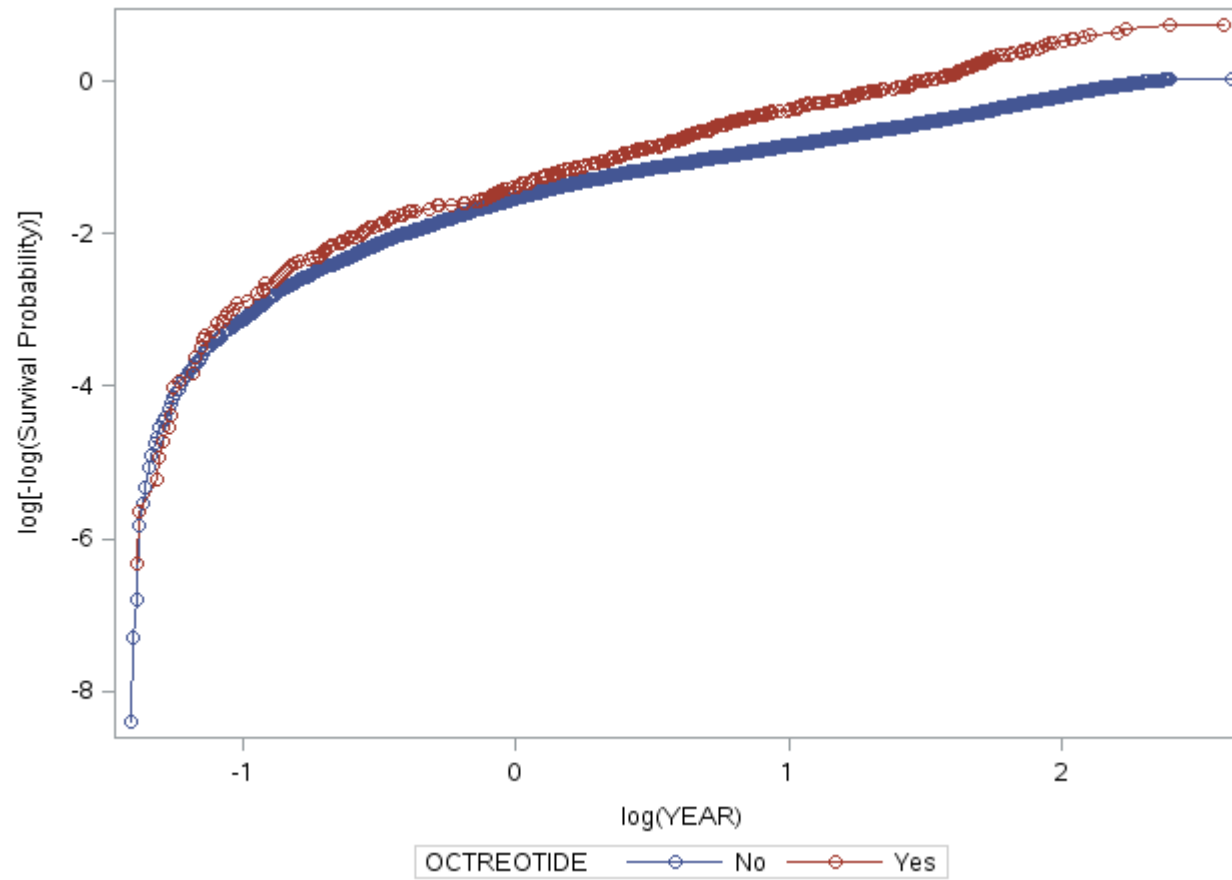

I. Site

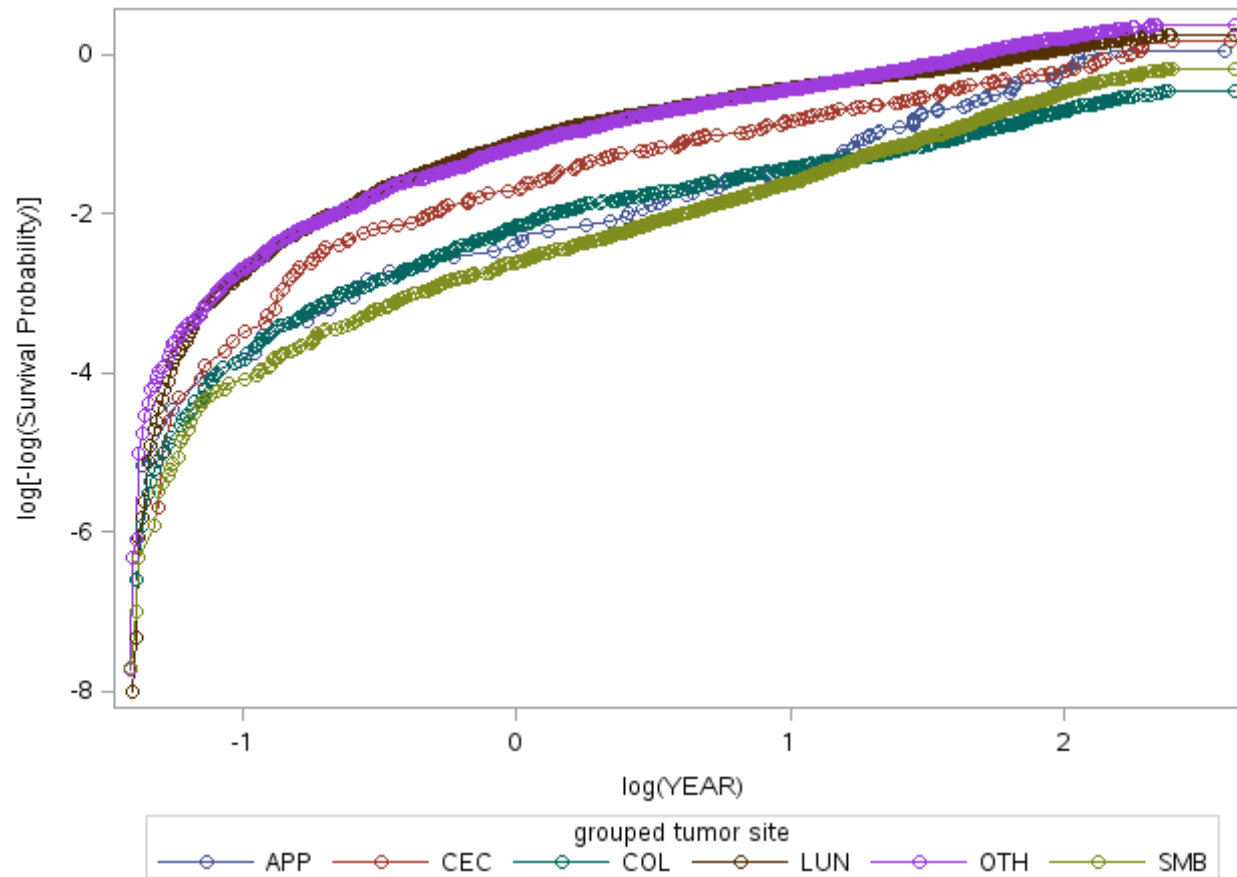

c. Proportional hazards assumption check for variable *Site*.

m. Grade

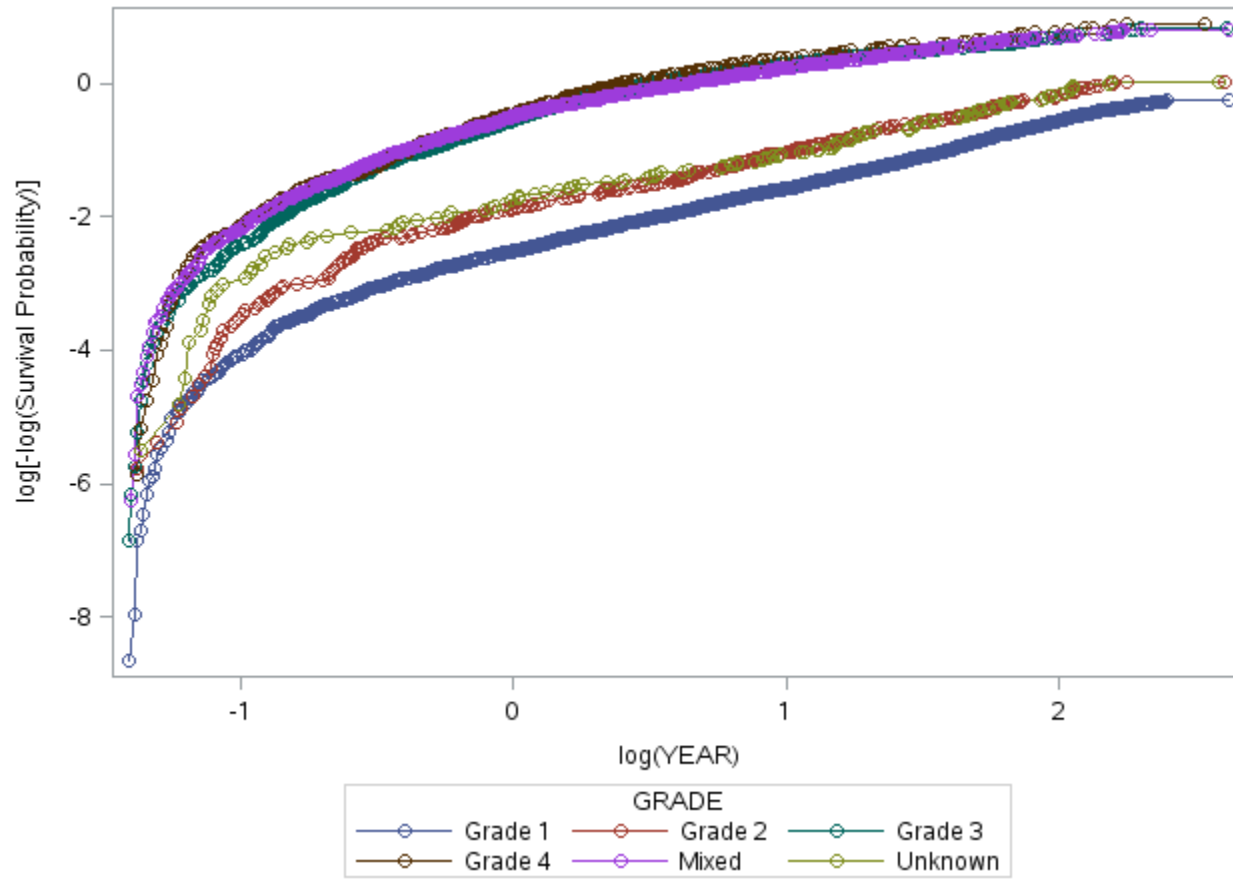

**Supplementary Figure 2. Overall Survival in Metastatic Grade 1-2 NETs of Other Primary Sites**

**a. Cecum**

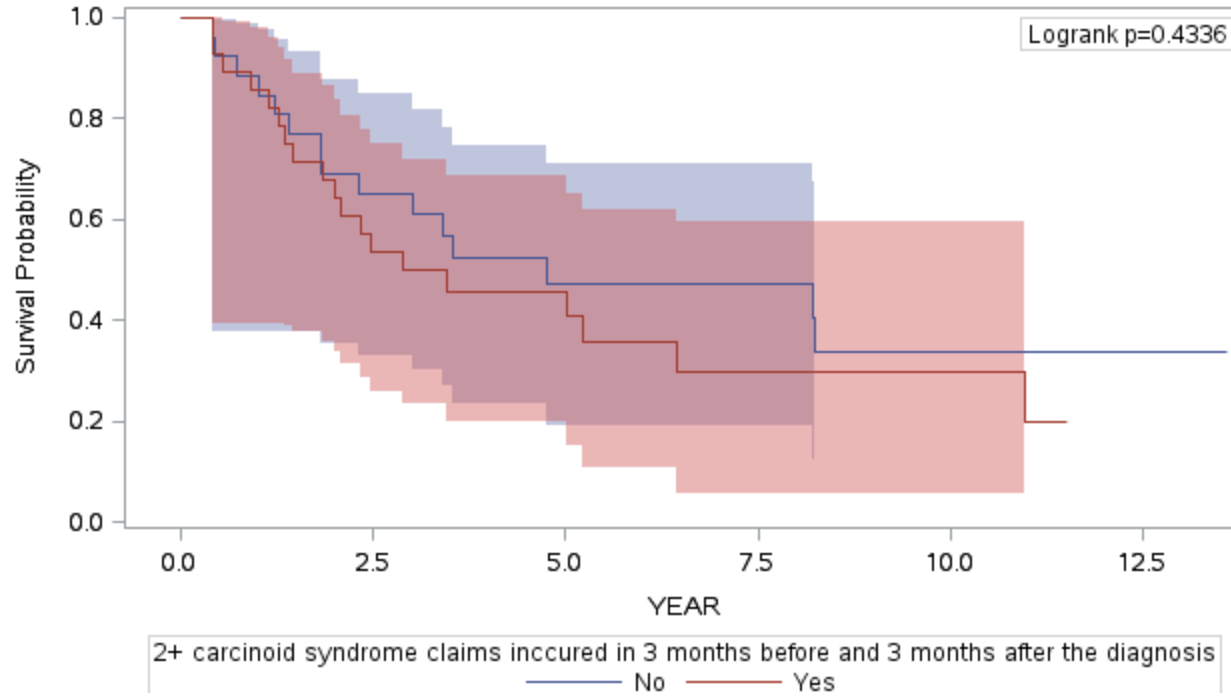

Number at risk (Number censored)

|     | 0            | 2.5          | 5.0       | 7.5       | 10.0      | 12.5      |
|-----|--------------|--------------|-----------|-----------|-----------|-----------|
| No  | 26 (Masked*) | 16 (Masked*) | (Masked*) | (Masked*) | (Masked*) | (Masked*) |
| Yes | 28 (Masked*) | 15 (Masked*) | (Masked*) | (Masked*) | (Masked*) | (Masked*) |

\* Masked per Surveillance, Epidemiology, and End Results-Medicare user agreement for confidentiality.

**b. Colon or Rectum**

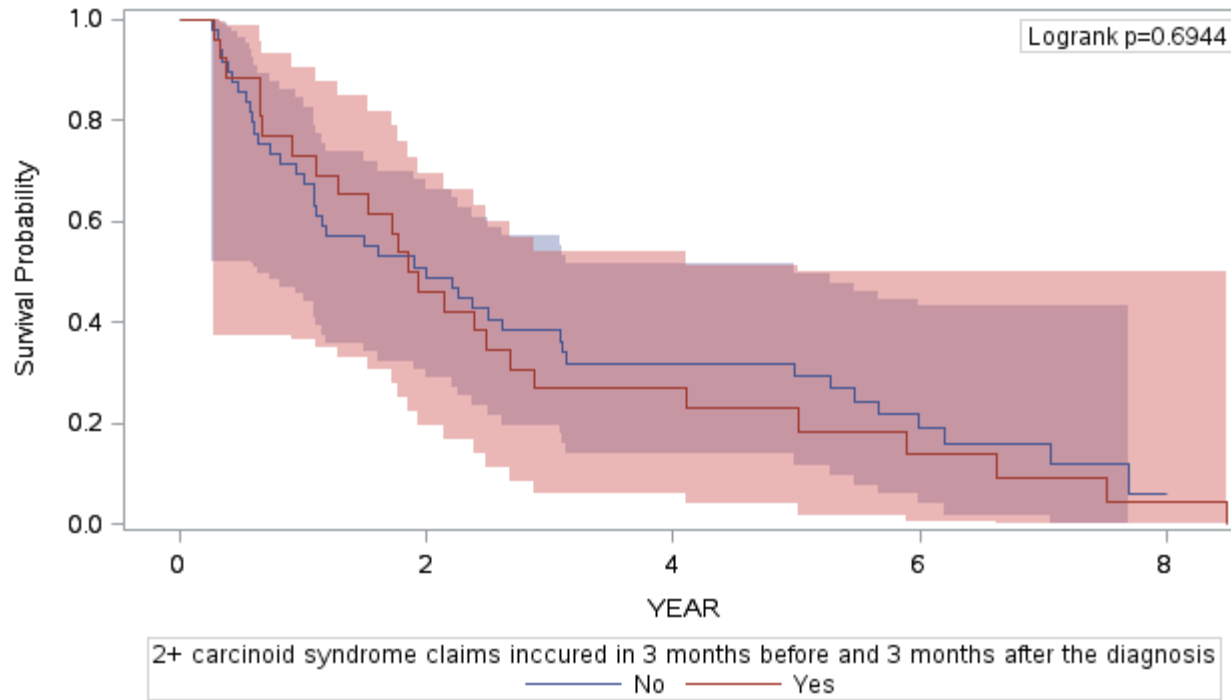

Number at risk (Number censored)

|     |              |              |                   |                   |                   |
|-----|--------------|--------------|-------------------|-------------------|-------------------|
| No  | 49 (Masked*) | 24 (Masked*) | 13 (Masked*)      | Masked* (Masked*) | Masked* (Masked*) |
| Yes | 26 (Masked*) | 12 (Masked*) | Masked* (Masked*) | Masked* (Masked*) | Masked* (Masked*) |

\* Masked per Surveillance, Epidemiology, and End Results-Medicare user agreement for confidentiality.



**c. Lung, Bronchus, and Other Respiratory Organs**

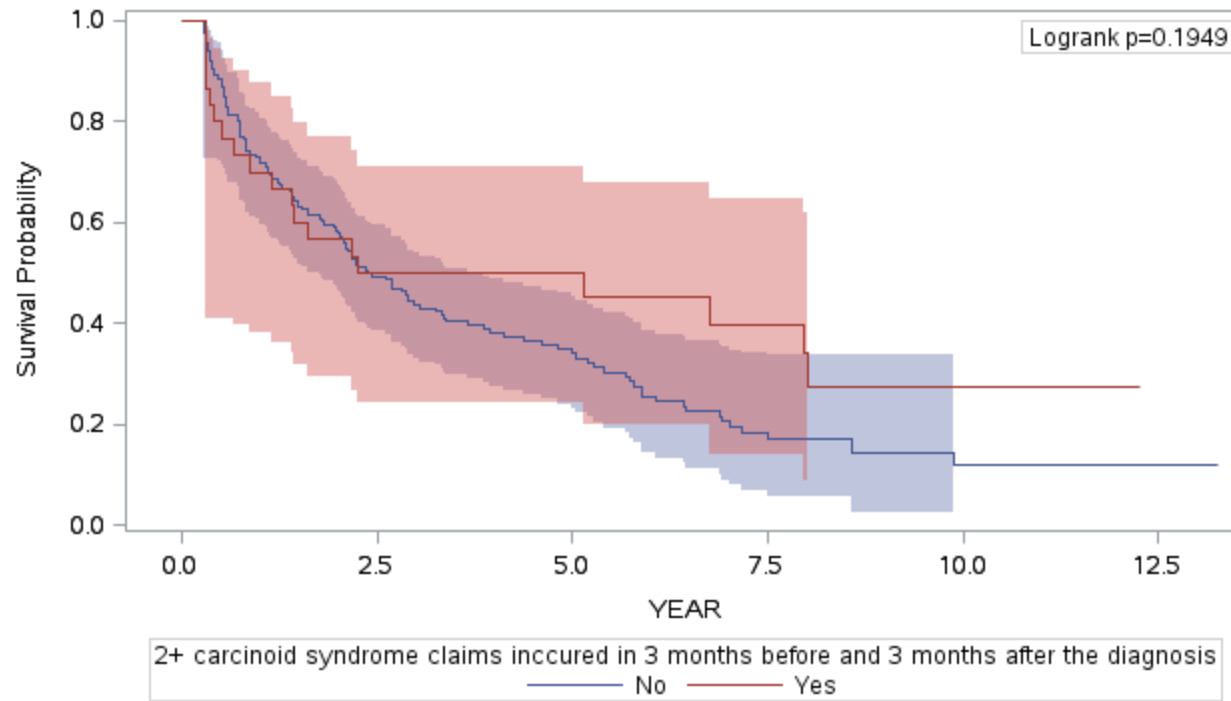

Number at risk (Number censored)

|     |                  |                 |                      |                      |                      |                      |
|-----|------------------|-----------------|----------------------|----------------------|----------------------|----------------------|
| No  | 166<br>(Masked*) | 81<br>(Masked*) | 40<br>(20)           | 13<br>(Masked*)      | Masked*<br>(Masked*) | Masked*<br>(40)      |
| Yes | 30<br>(Masked*)  | 15<br>(Masked*) | Masked*<br>(Masked*) | Masked*<br>(Masked*) | Masked*<br>(Masked*) | Masked*<br>(Masked*) |

\* Masked per Surveillance, Epidemiology, and End Results-Medicare user agreement for confidentiality.
